# Supplementary material for: On the skill of raw and postprocessed ensemble seasonalmeteorological forecasts in Denmark
Source: Copernicus journal article supplement (doi:10.5194/hess-2017-366), 2017-07-11
Supplement: Supplementary file 1 [file hess-2017-366-supplement.pdf]

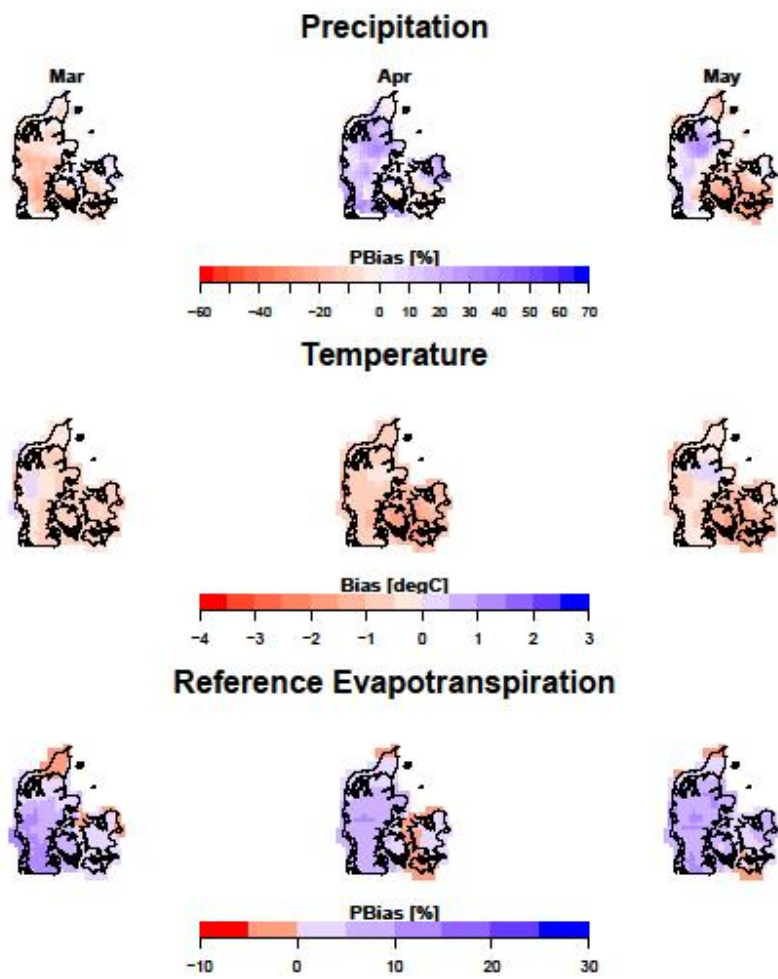

Figure S1: As in Fig. 4, but for spring.

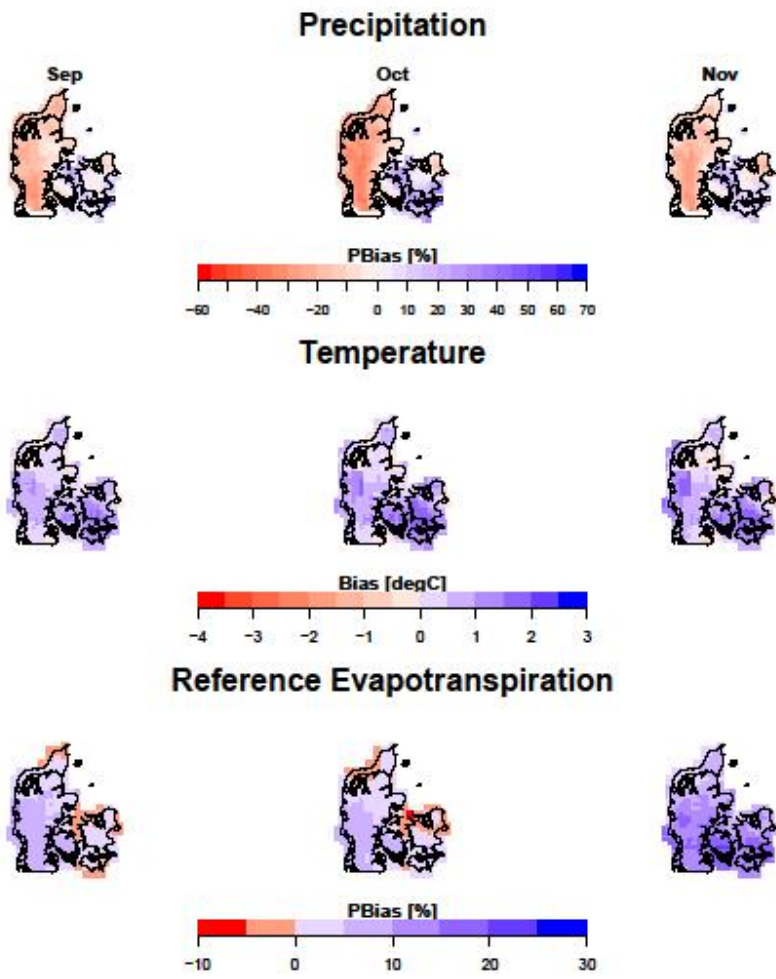

Figure S2: As in Fig. 4, but for autumn.

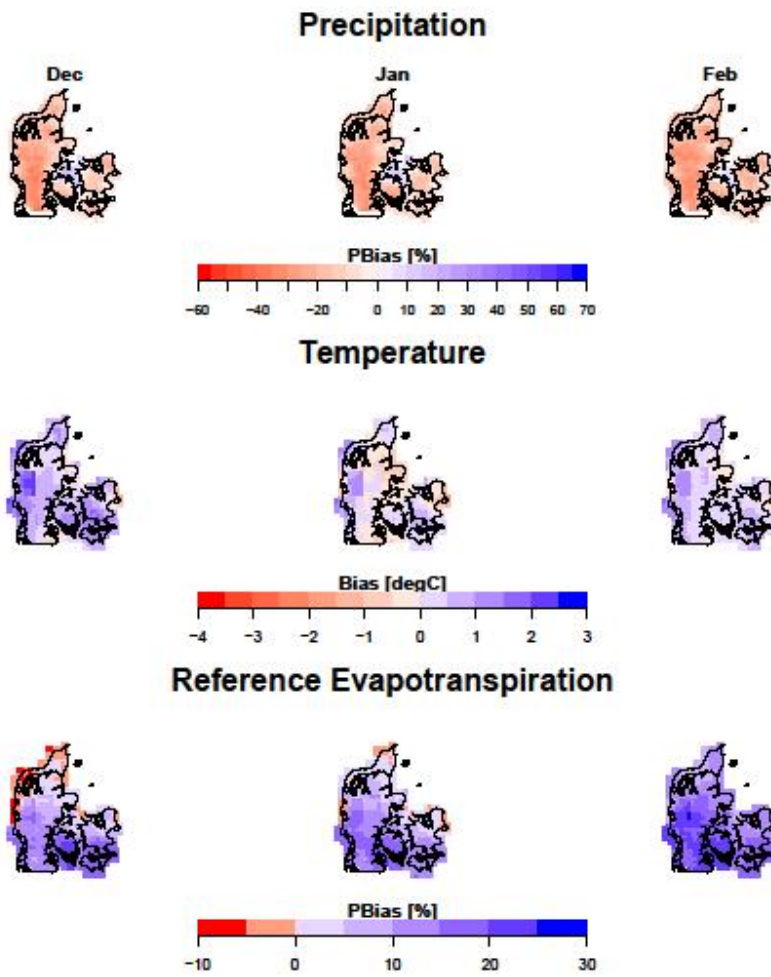

Figure S3: As in Fig. 4, but for winter.

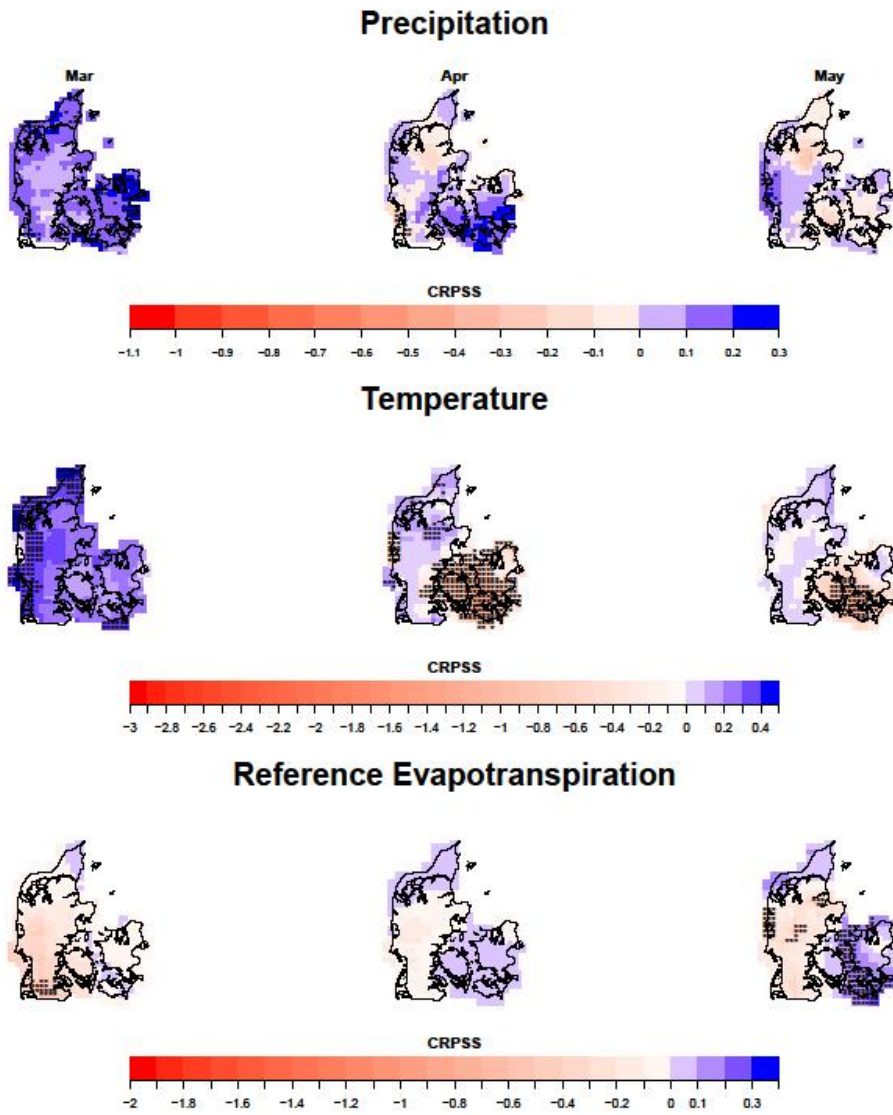

Figure S4: As in Fig. 6, but for spring.

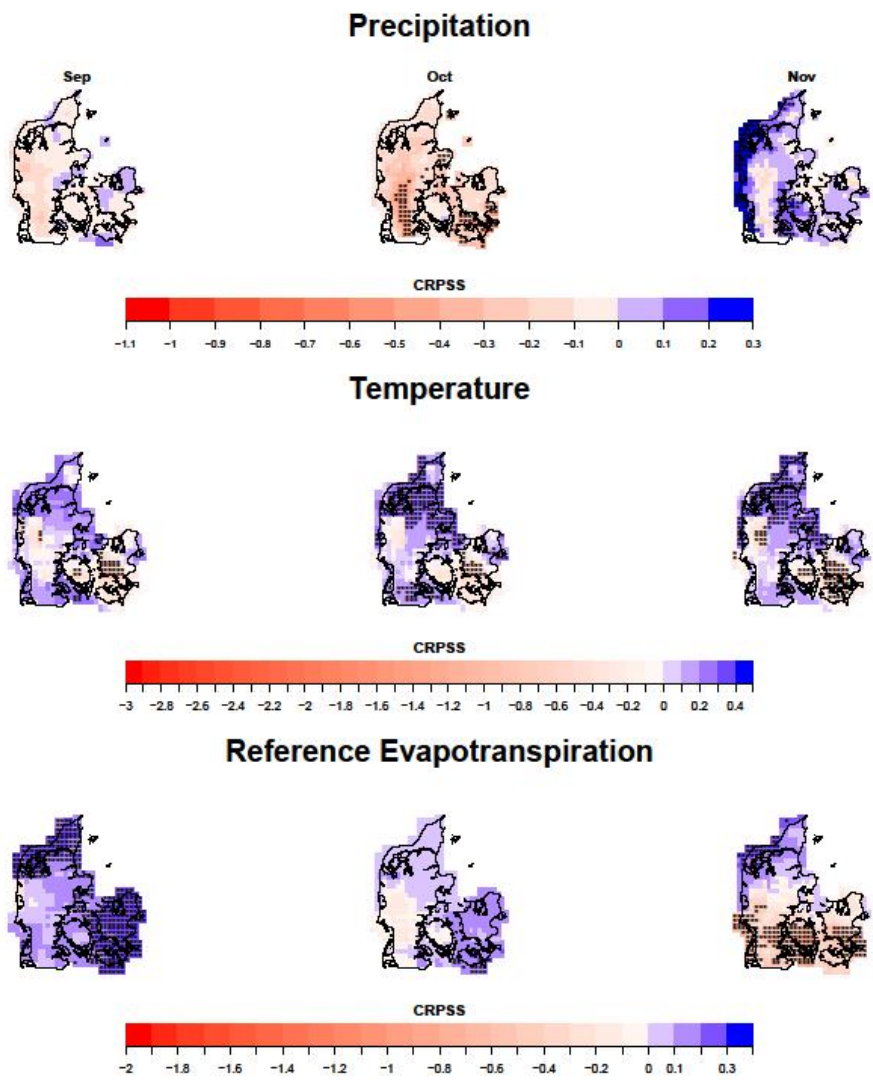

Figure S5: As in Fig. 6, but for autumn.

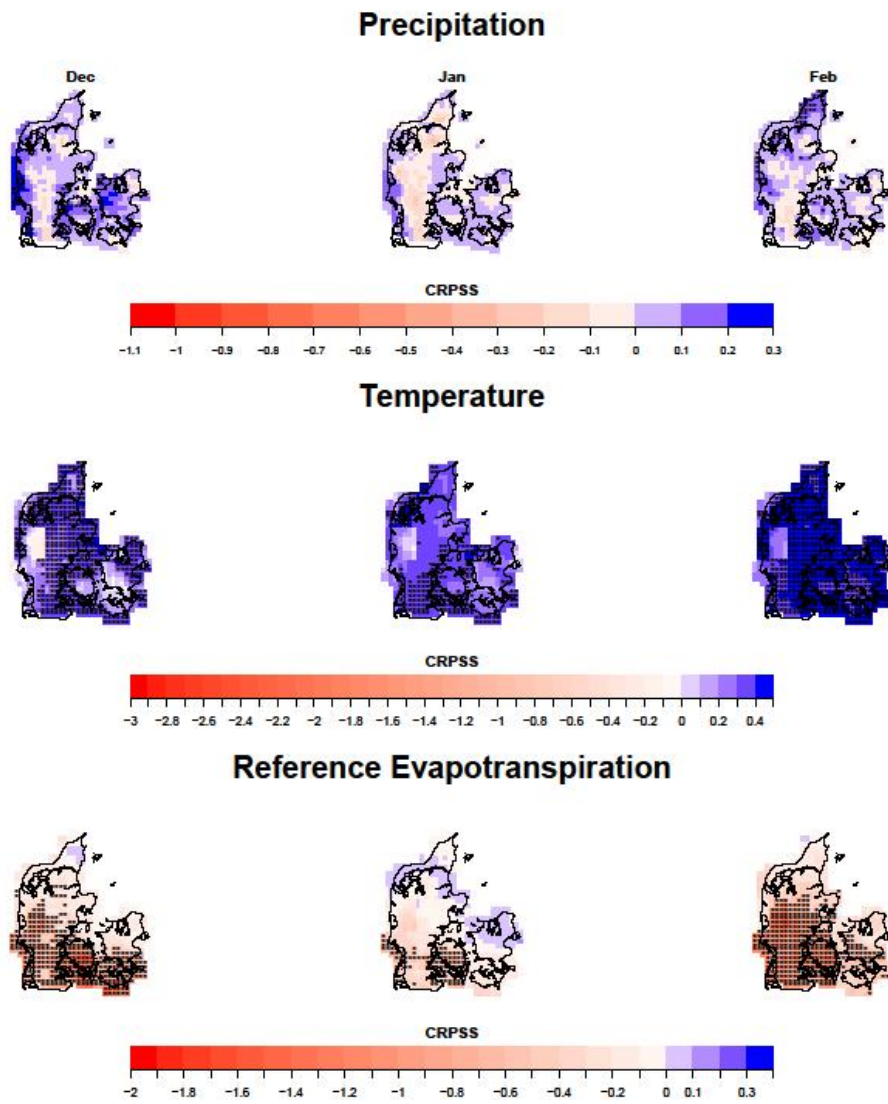

Figure S6: As in Fig. 6, but for winter.



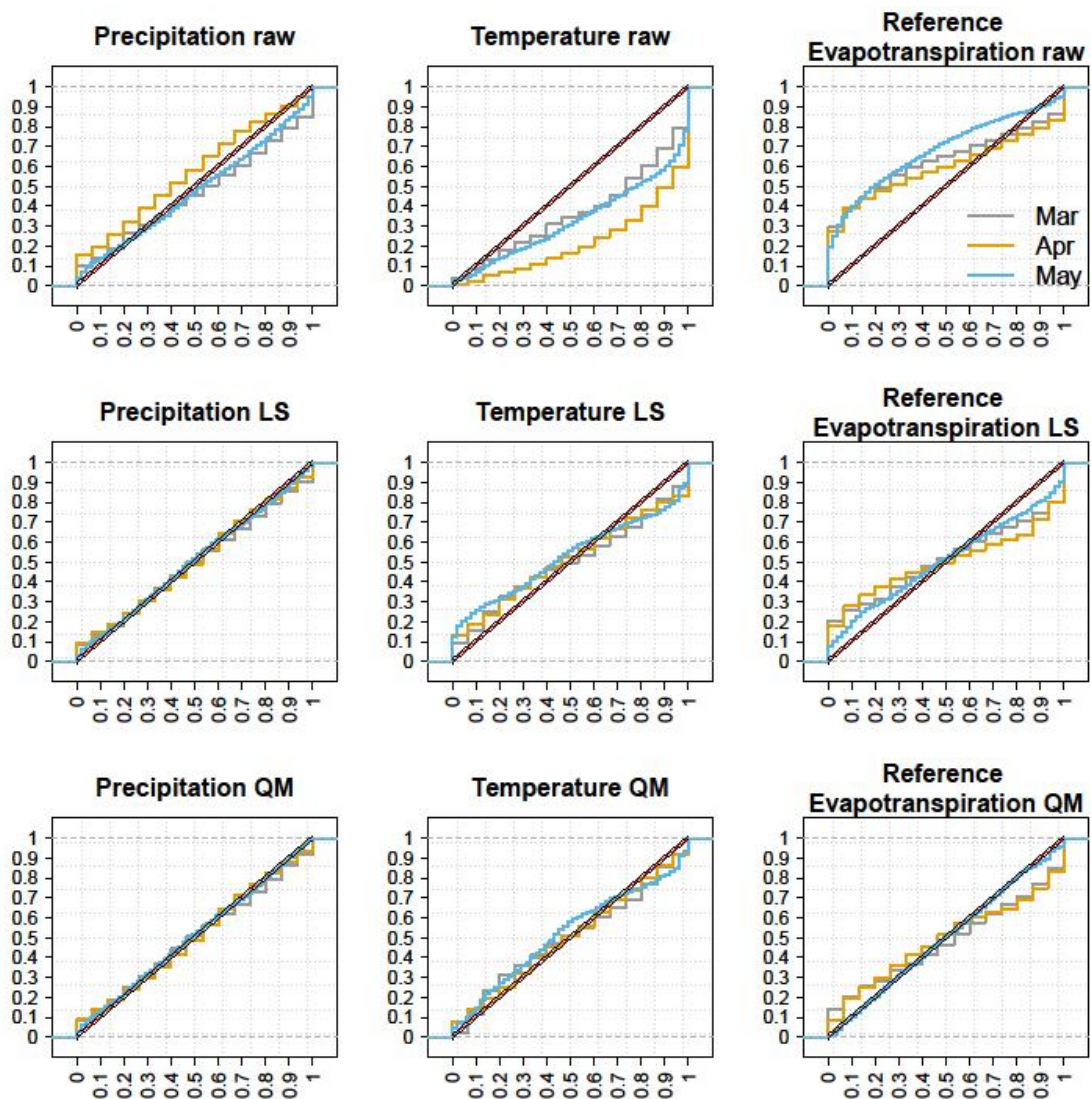

Figure S7: As in Fig. 7, but for spring.

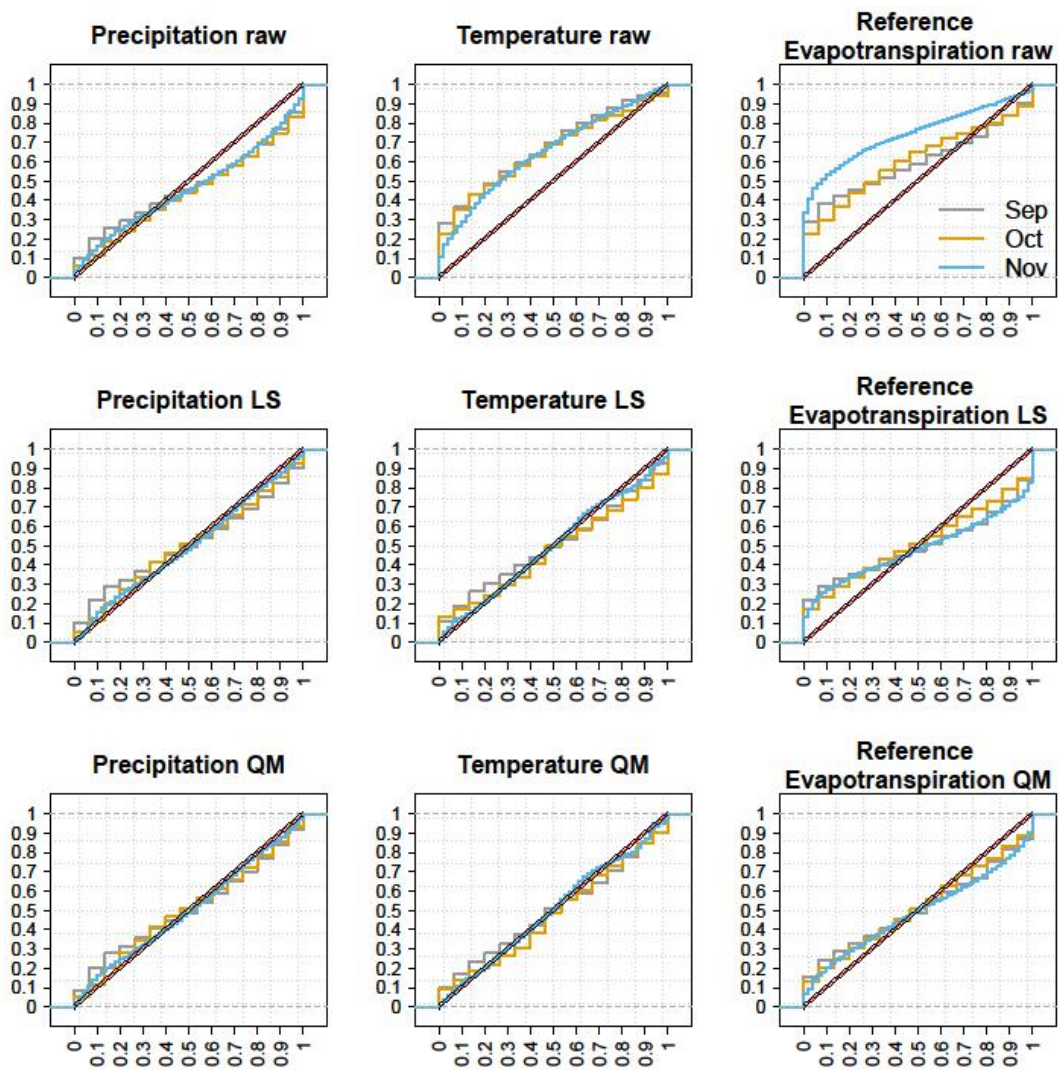

Figure S8: As in Fig. 7, but for autumn.



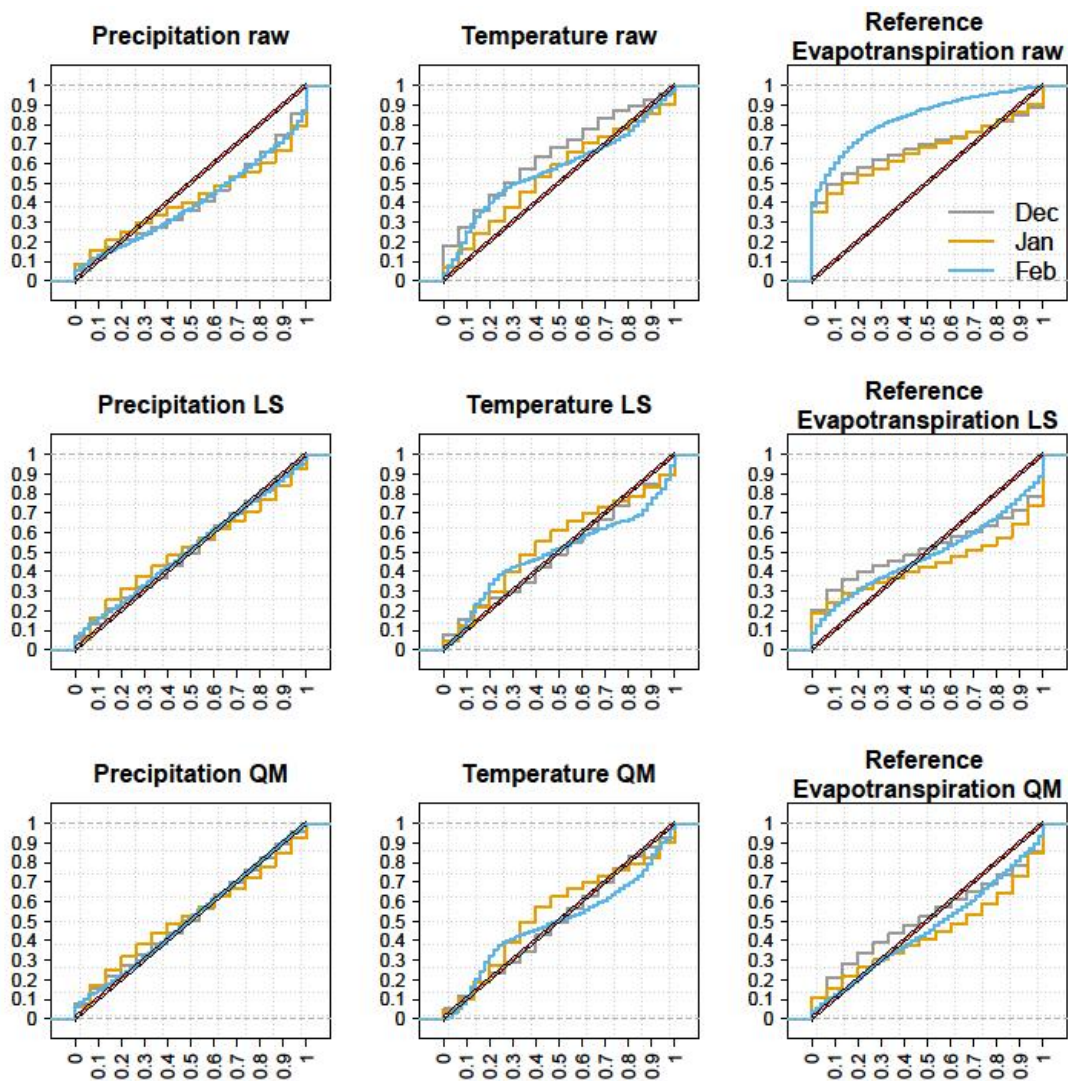

Figure S9: As in Fig. 7, but for winter.

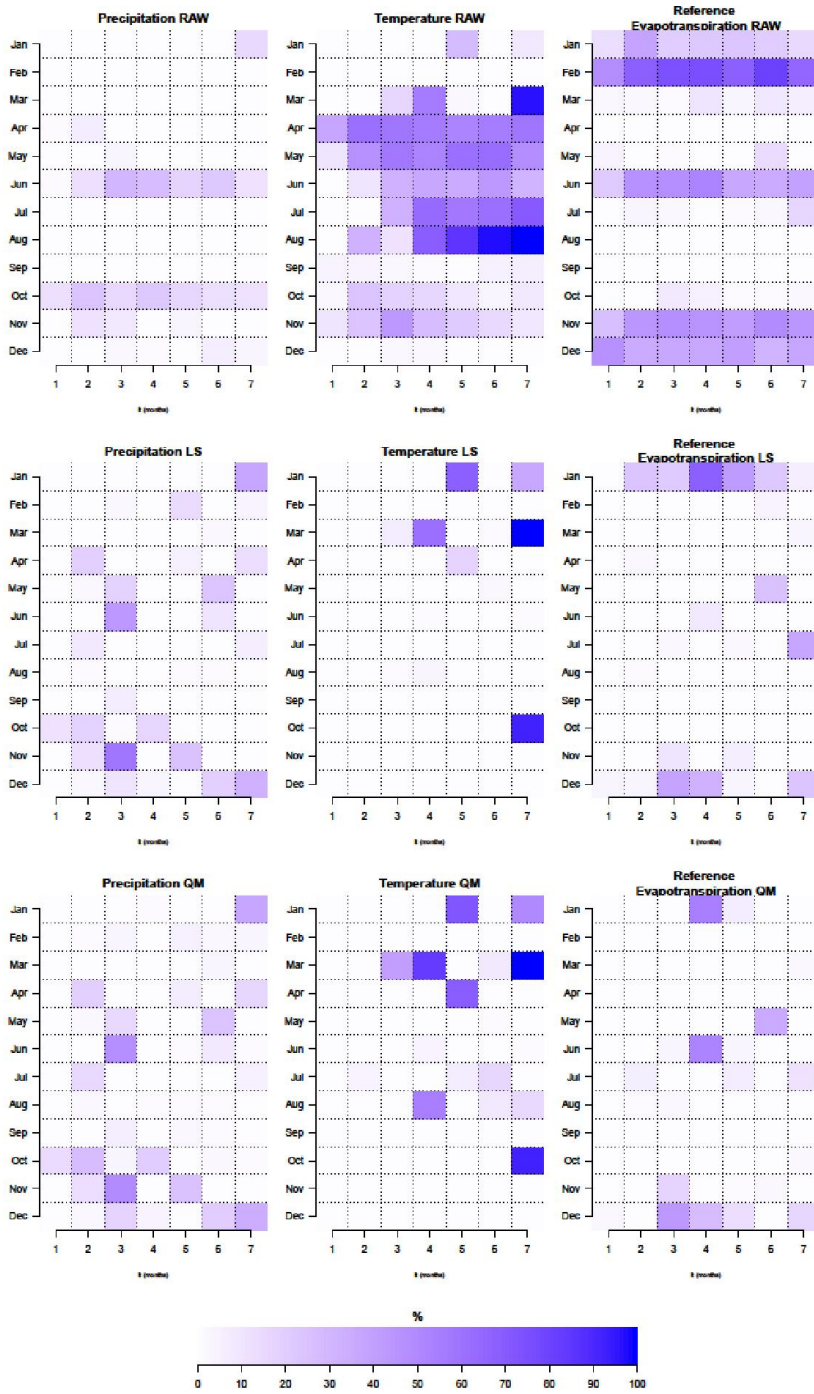

Figure S10: As in Fig. 9, but for negative accuracy (CRPS in Eq. (8)).

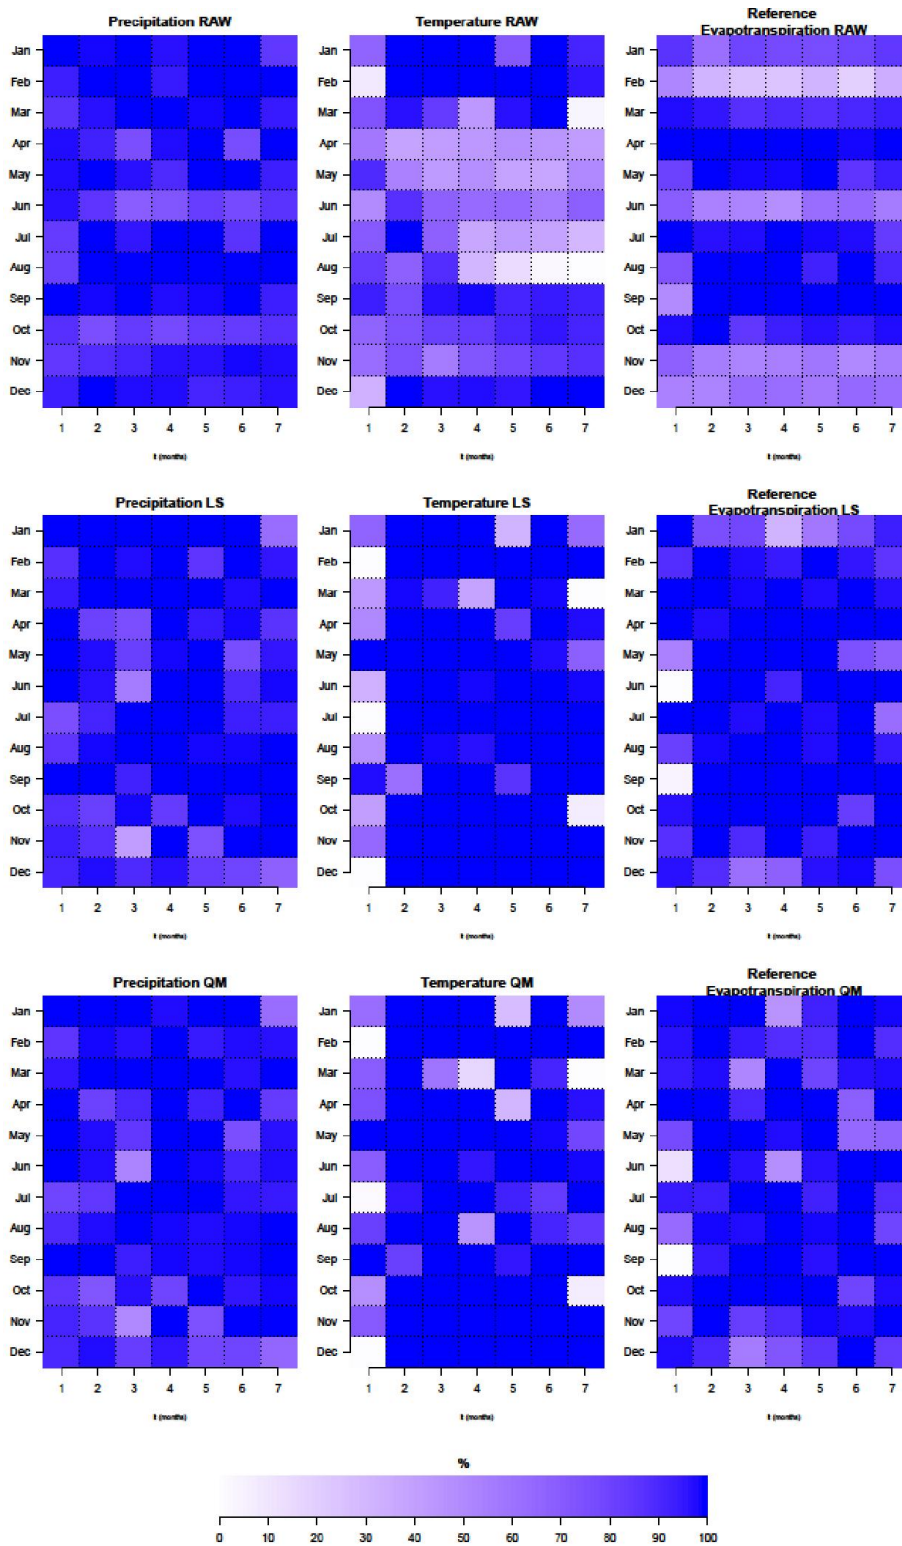

Figure S11: As in Fig. 9, but for equal accuracy (CRPSS in Eq. (8)).



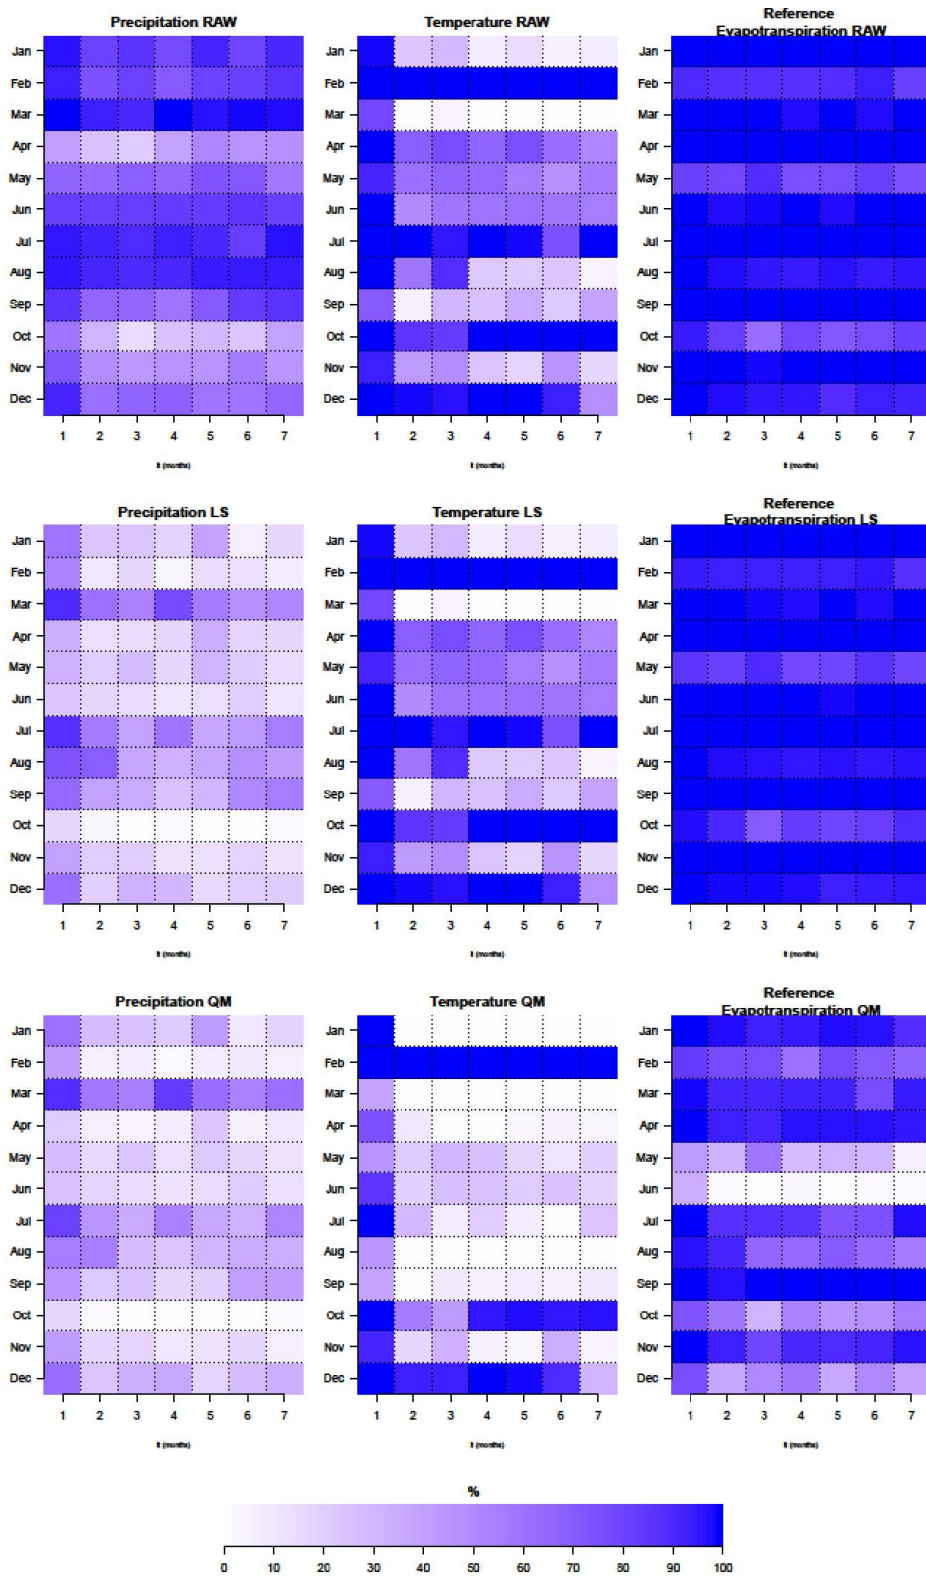

Figure S12: As in Fig. 9, but for positive sharpness (SS in Eq. (8)).

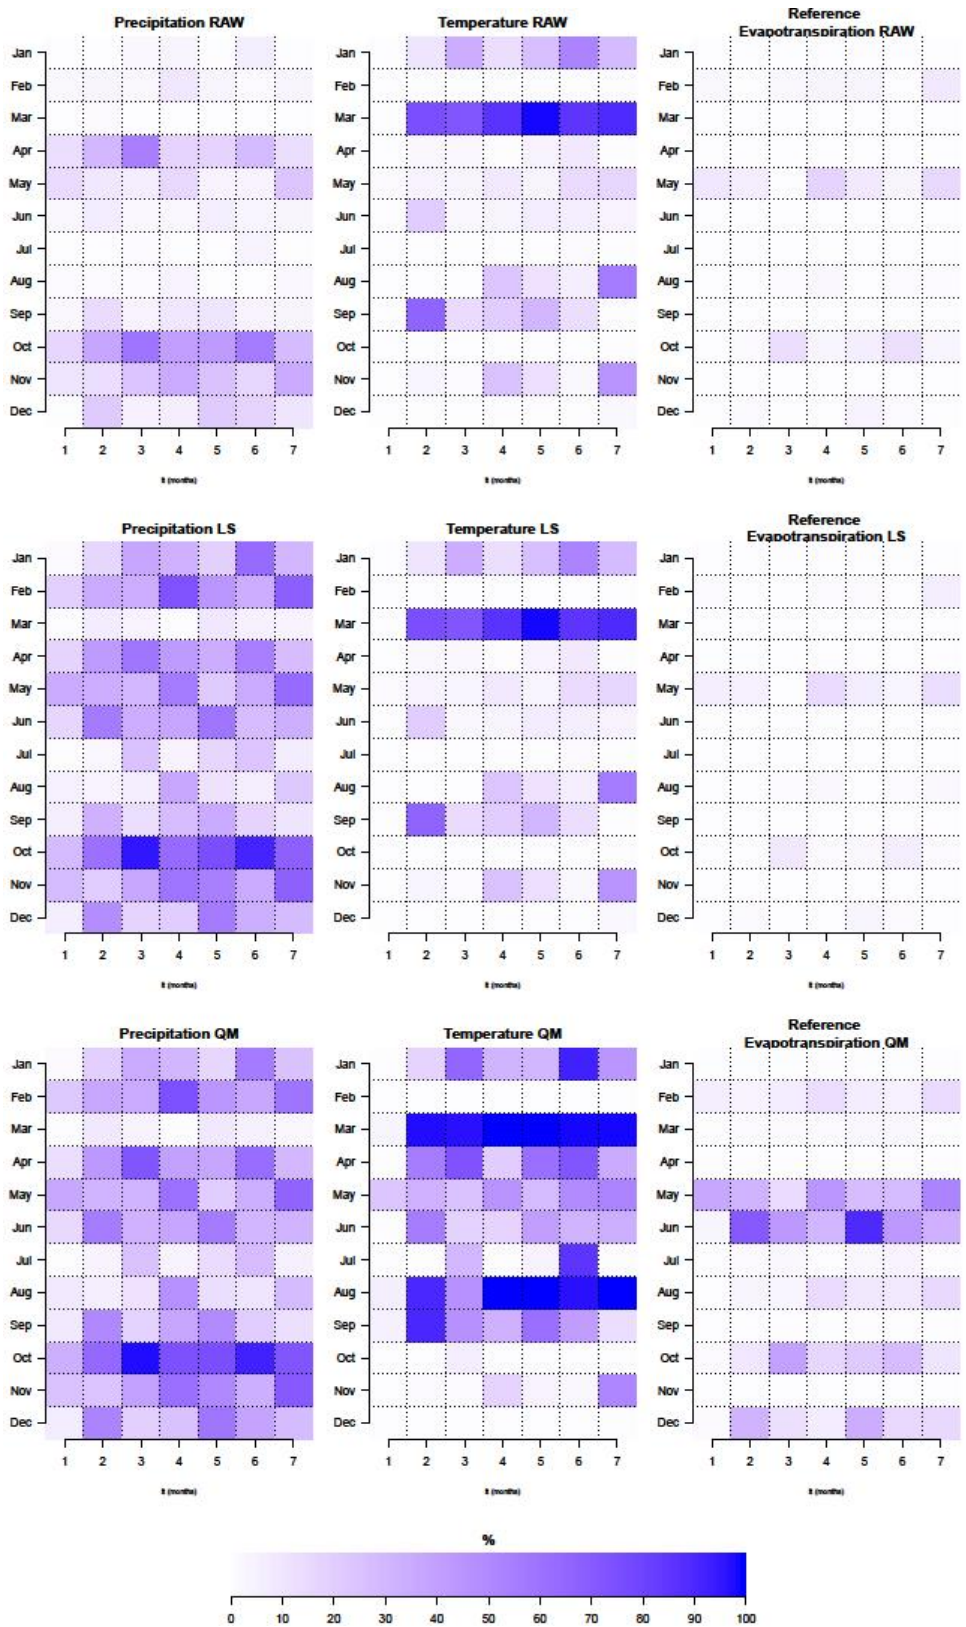

Figure S13: As in Fig. 9, but for negative sharpness (SS in Eq. (8)).



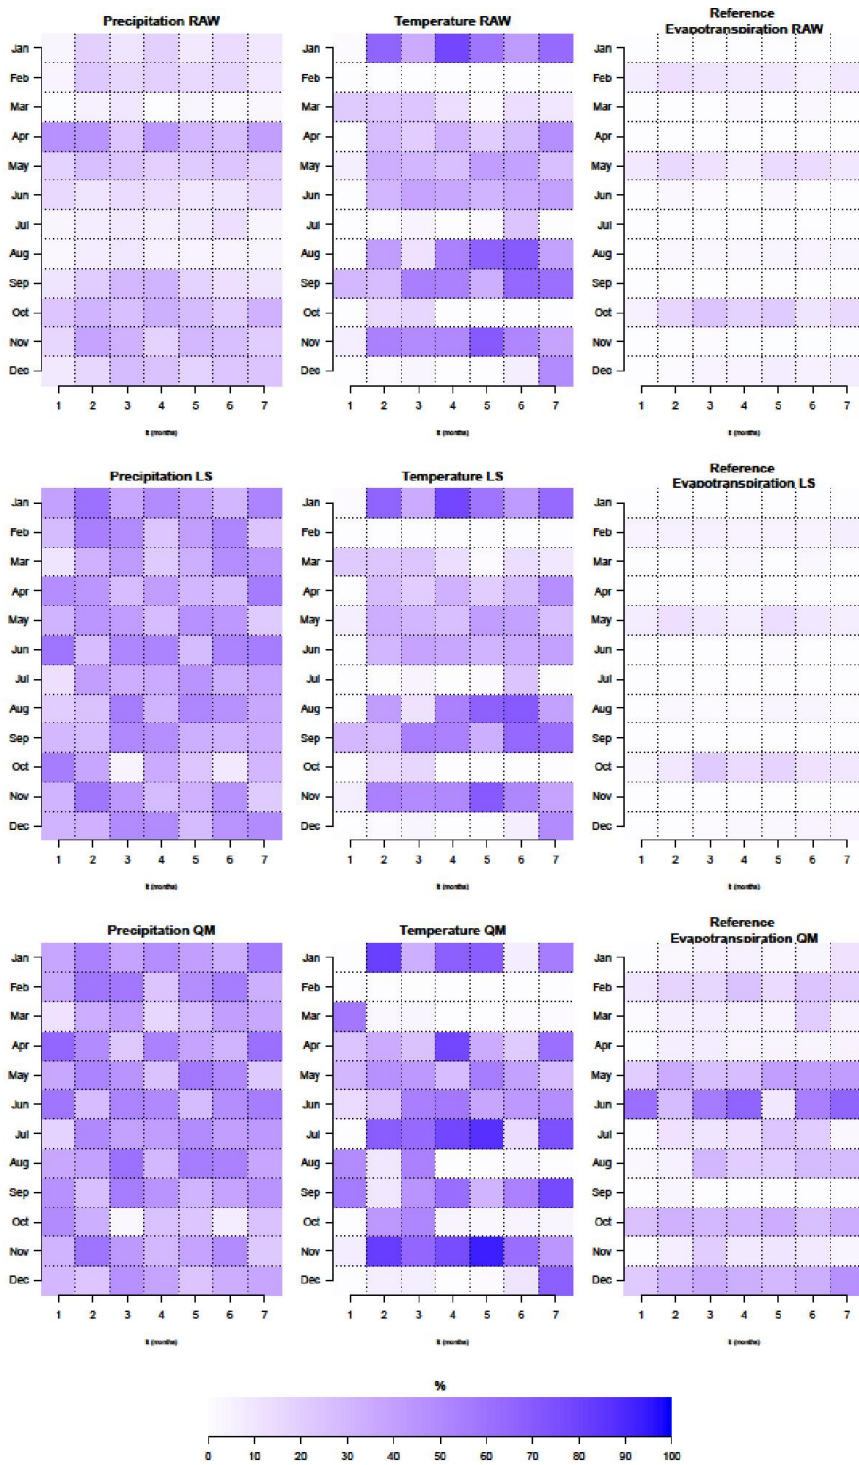

Figure S14: As in Fig. 9, but for equal sharpness (SS in Eq. (8)).
